# Supplementary material for: Histone H3K4me3 modification is a transgenerational epigenetic signal for lipid metabolism in Caenorhabditis elegans
Source: PubMed Central journal article supplement (PMC8828817; doi:10.1038/s41467-022-28469-4), 2022-02-09
Supplement: 41467_2022_28469_MOESM1_ESM.pdf [file 41467_2022_28469_MOESM1_ESM.pdf]

**Histone H3K4me3 modification is a transgenerational epigenetic signal for lipid  
metabolism in *Caenorhabditis elegans***

Qin-Li Wan<sup>1,2,3,#</sup>, Xiao Meng<sup>1,2,#</sup>, Chongyang Wang<sup>1,2</sup>, Wenyu Dai<sup>1,2</sup>, Zhenhuan  
Luo<sup>1,2</sup>, Zhinan Yin<sup>1,2</sup>, Zhenyu Ju<sup>4</sup>, Xiaodie Fu<sup>1,2</sup>, Jing Yang<sup>1,2</sup>, Qunshan Ye<sup>1,2</sup>,  
Zhan-Hui Zhang<sup>5</sup>, Qinghua Zhou<sup>1,2,\*</sup>

<sup>1</sup> The Sixth Affiliated Hospital of Jinan University, Jinan University, Dongguan, 523560,  
Guangdong, China

<sup>2</sup> The Biomedical Translational Research Institute, Faculty of Medical Science, Jinan  
University, Guangzhou, 510632, Guangdong, China

<sup>3</sup> Department of pathogen biology, school of medicine, Jinan University, Guangzhou  
510632, China

<sup>4</sup> Key Laboratory of Regenerative Medicine of Ministry of Education, Institute of  
Aging and Regeneration Medicine, Jinan University, Guangzhou, Guangdong,  
510632, China

<sup>5</sup> The First Affiliated Hospital, Jinan University, Guangzhou, Guangdong, 510632,  
China

# Qin-Li Wan and Xiao Meng have contributed equally to this work

\*Corresponding author: Dr. Qinghua Zhou

The Sixth Affiliated Hospital of Jinan University, Jinan University, Dongguan,

523560, Guangdong, China

Phone: +86 20 85222787; Fax: +86 20 85222787

E-mail address: [gene@email.jnu.edu.cn](mailto:gene@email.jnu.edu.cn)

## Supplementary Information

### Contents:

**Supplementary Fig. 1 TEI of lipid accumulation induced by HFD.**

**Supplementary Fig. 2 The effect of HFD on lifespan of *C. elegans*.**

**Supplementary Fig. 3 Epistasis analyses of *nhr-49*, *nhr-80*, *sbp-1* and *daf-16* in multigenerational obesogenic effects induced by HFD.**

**Supplementary Fig. 4 NHR-49, NHR-80, SBP-1, FAT-6 and FAT-7 are responsible for TEI of lipid accumulation induced by HFD.**

**Supplementary Fig. 5 HFD-induced TEI of lipid accumulation requires DAF-16.**

**Supplementary Fig. 6 Other histone modifications including H3K27me3 and H3K36me3 are not required for transgenerational inheritance of lipid accumulation induced by the HFD.**

**Supplementary Fig. 7 Analyses of differentially expressed genes from P0 worms with or without HFD in wild-type worms.**

**Supplementary Fig. 8 DAF-16, NHR-80 and NHR-49 did not affect the elevation of H3K4me3 induced by HFD.**

**Supplementary Fig. 9 DAF-16 mediated TEI induced by HFD in a DAF-2 independent manner.**

**Supplemental Fig. 10 Tissue-specific RNAi of *sbp-1*.**

**Supplementary Table 1 The primers used in RT-qPCR and Chip-qPCR.**

Supplementary Fig. 1

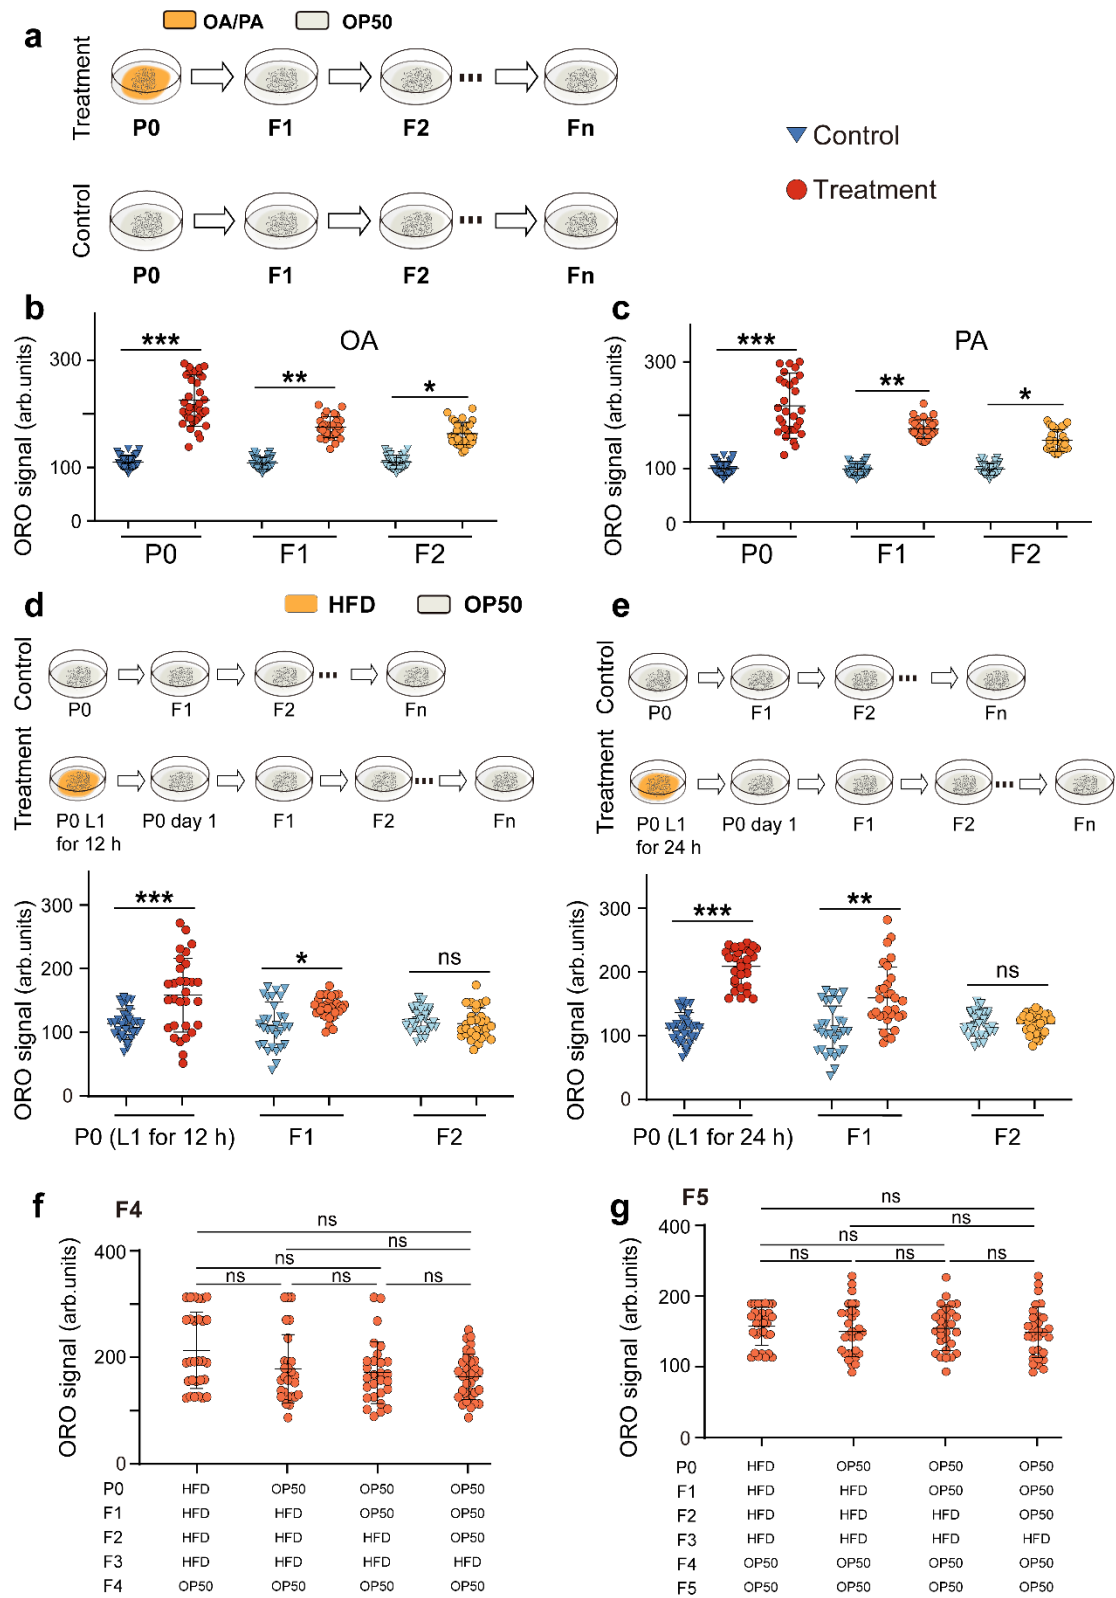

Supplementary Fig. 1 TEI of lipid accumulation induced by HFD. (a-c)

Transgenerational inheritance of lipid accumulation induced by OA ( $n \geq 29$  per condition) **(b)** or PA ( $n \geq 29$  per condition) **(c)** in wild-type *C. elegans*. PA: palmitoleic acid; OA: oleic acid. **(d, e)** Quantification of ORO staining of recovered F1 or F2 from parents fed with HFD from L1 larvae for 12 h ( $n \geq 30$  per condition) **(d)** or 24 h ( $n \geq 30$  per condition) **(e)**. For Fig. **b-e**, graph data are presented as mean  $\pm$  SD, statistical analyses were performed by unpaired two-tailed Student's t-test; \*\*\*  $p < 0.001$ , \*\*  $p < 0.01$ , \*  $p < 0.05$ , and ns, no significance. The ORO staining values of the replicated tests are listed in Source Data file. **(f, g)** Statistical analyses of ORO staining of treatment animals from Fig. 1f & g by ANOVA analysis ( $n \geq 28$  per condition; ns, no significance). Source data are provided as a Source Data file.

## Supplementary Fig. 2

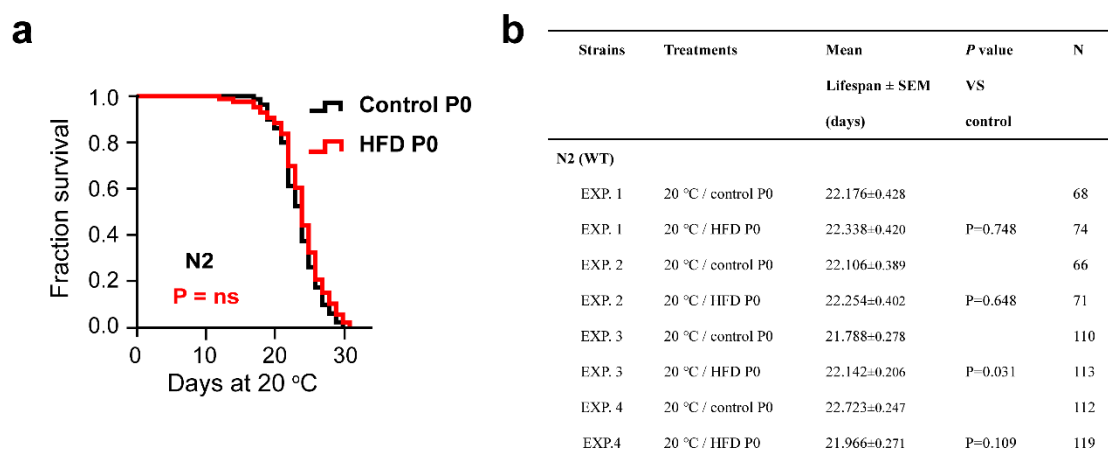

**Supplementary Fig. 2 The effect of HFD on lifespan of *C. elegans*.** **(a)** Survival analyses of wild-type N2 worms fed with HFD from L1 larvae to young adults. **(b)** Detailed lifespan values from repeat experiments. Lifespan was analyzed using the Kaplan-Meier test,  $P$  values were calculated using the log-rank test.

### Supplementary Fig. 3

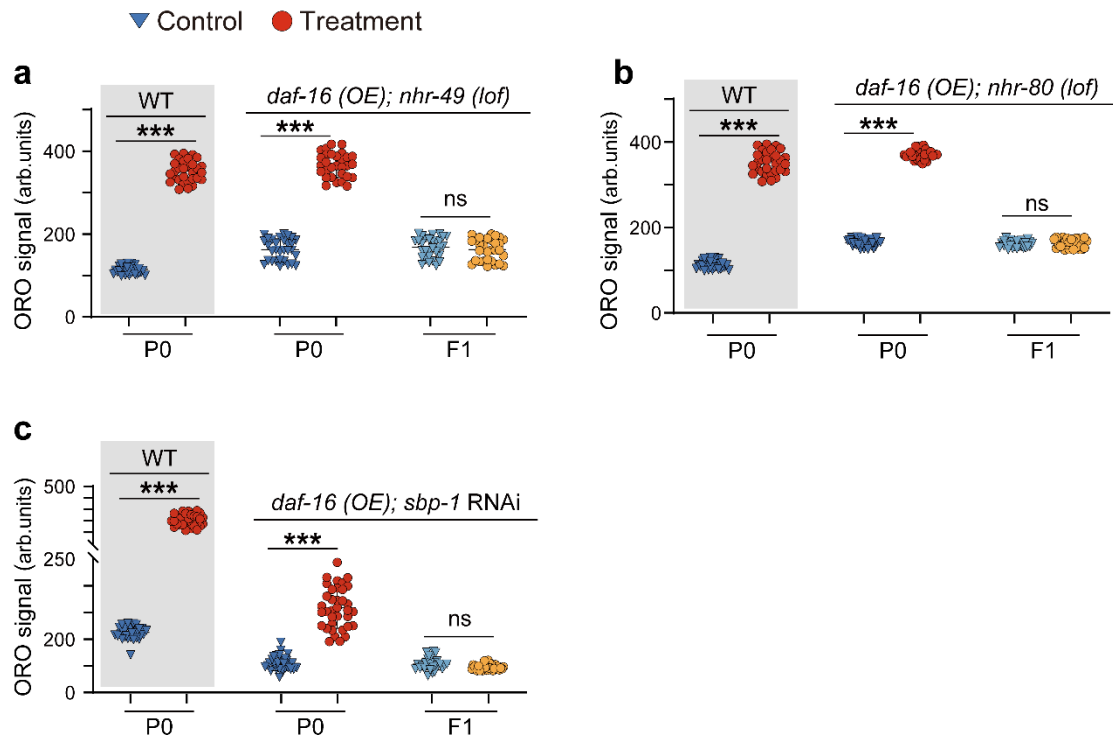

**Supplementary Fig. 3 Epistasis analyses of *nhr-49*, *nhr-80*, *sbp-1* and *daf-16* in multigenerational obesogenic effects induced by HFD.** Transgenerational inheritance test of HFD-induced lipid accumulation in *daf-16(OE); nhr-49(lof)* double mutant ( $n \geq 30$  per condition) **(a)**, *daf-16(OE); nhr-80(lof)* double mutant ( $n \geq 30$  per condition) **(b)**, and *daf-16(OE); sbp-1* RNAi mutant ( $n \geq 30$  per condition) **(c)**. Graph data are presented as mean  $\pm$  SD, statistical analyses were performed by unpaired two-tailed Student's t-test; \*\*\*  $p < 0.001$ , ns, no significance. Source data are provided as a Source Data file.

Supplementary Fig. 4

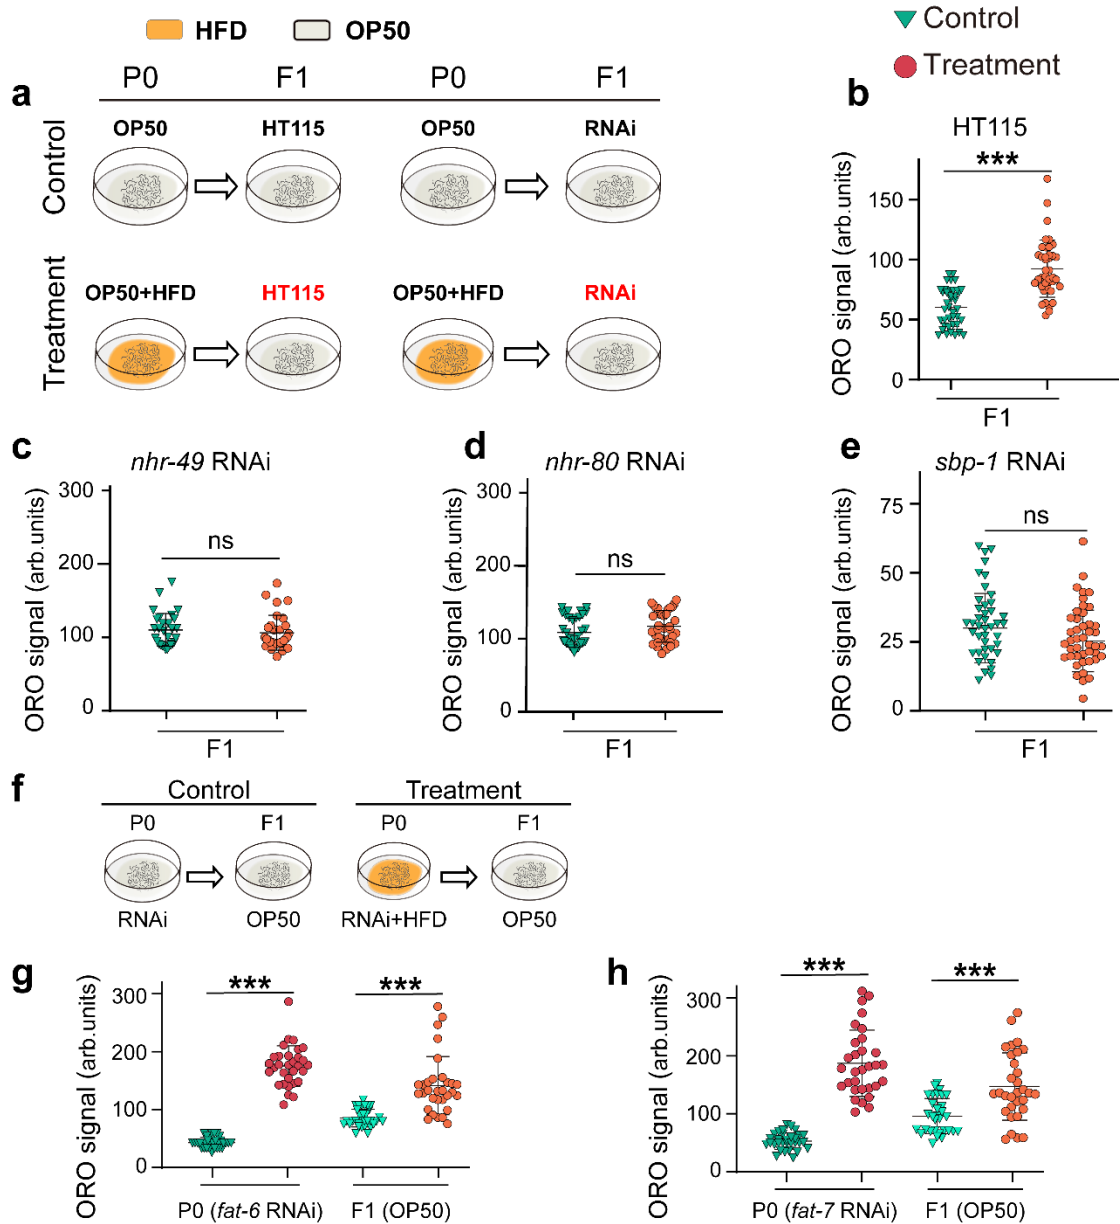

**Supplementary Fig. 4 NHR-49, NHR-80, SBP-1, FAT-6 and FAT-7 are responsible for TEI of lipid accumulation induced by HFD. (a)** Experimental scheme. **(b-e)** P0 worms were fed with or without HFD, and F1 progeny were exposed to control (HT115) ( $n \geq 27$  per condition) **(b)**, *nhr-49* RNAi ( $n \geq 31$  per condition) **(c)**, *nhr-80* RNAi ( $n \geq 32$  per condition) **(d)** and *sbp-1* RNAi ( $n \geq 36$  per condition) **(e)** to determine the

requirement of *nhr-49*, *nhr-80* and *sbp-1* in the F1 generation. **(f-h)** P0 animals were fed with or without HFD and subjected to *fat-6* RNAi ( $n \geq 31$  per condition) **(g)** or *fat-7* RNAi ( $n \geq 31$  per condition) **(h)**, and then lipid levels of F1 progeny fed with OP50 were analyzed. The ORO staining values of the replicated tests are listed in Source Data file. For Fig. **b-e** and **g-h**, graph data are presented as mean  $\pm$  SD; Student's t-test; \*\*\*  $p < 0.001$ , ns, no significance). Source data are provided as a Source Data file.

### Supplementary Fig. 5

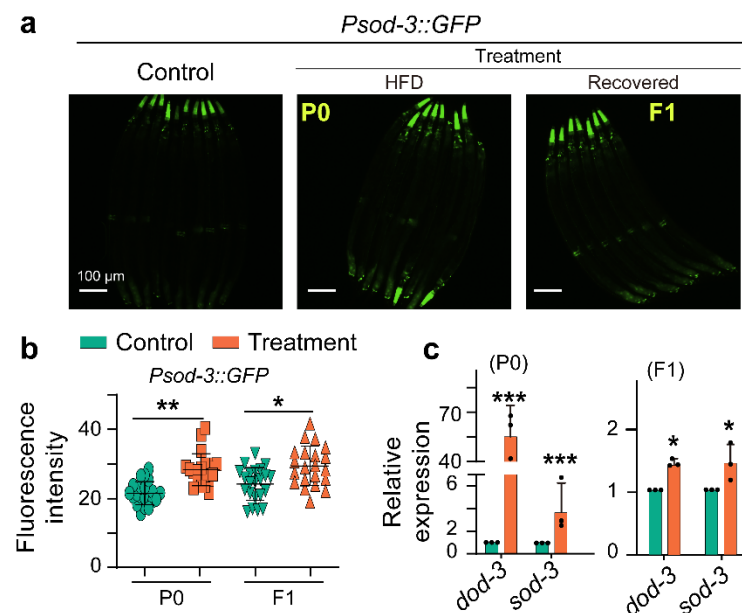

### Supplementary Fig. 5 HFD-induced TEI of lipid accumulation requires DAF-16.

**(a, b)** The SOD-3::GFP expression of worms fed with or without HFD and their recovered F1 progeny (mean  $\pm$  SD; two-sided Student's t-test;  $n \geq 21$ ; \*\*  $p < 0.01$  and \*  $p < 0.05$ ) **(a)** is representative of three repeat experiments). **(c)** mRNA levels of target genes of DAF-16 (*sod-3* and *dod-3*) in P0 animals fed with or without the HFD and their recovered progeny (mean  $\pm$  SD; unpaired two-tailed Student's t-test;  $n = 3$  biologically independent samples; \*\*\*  $p < 0.001$  and \*  $p < 0.05$ ).



Supplementary Fig. 6

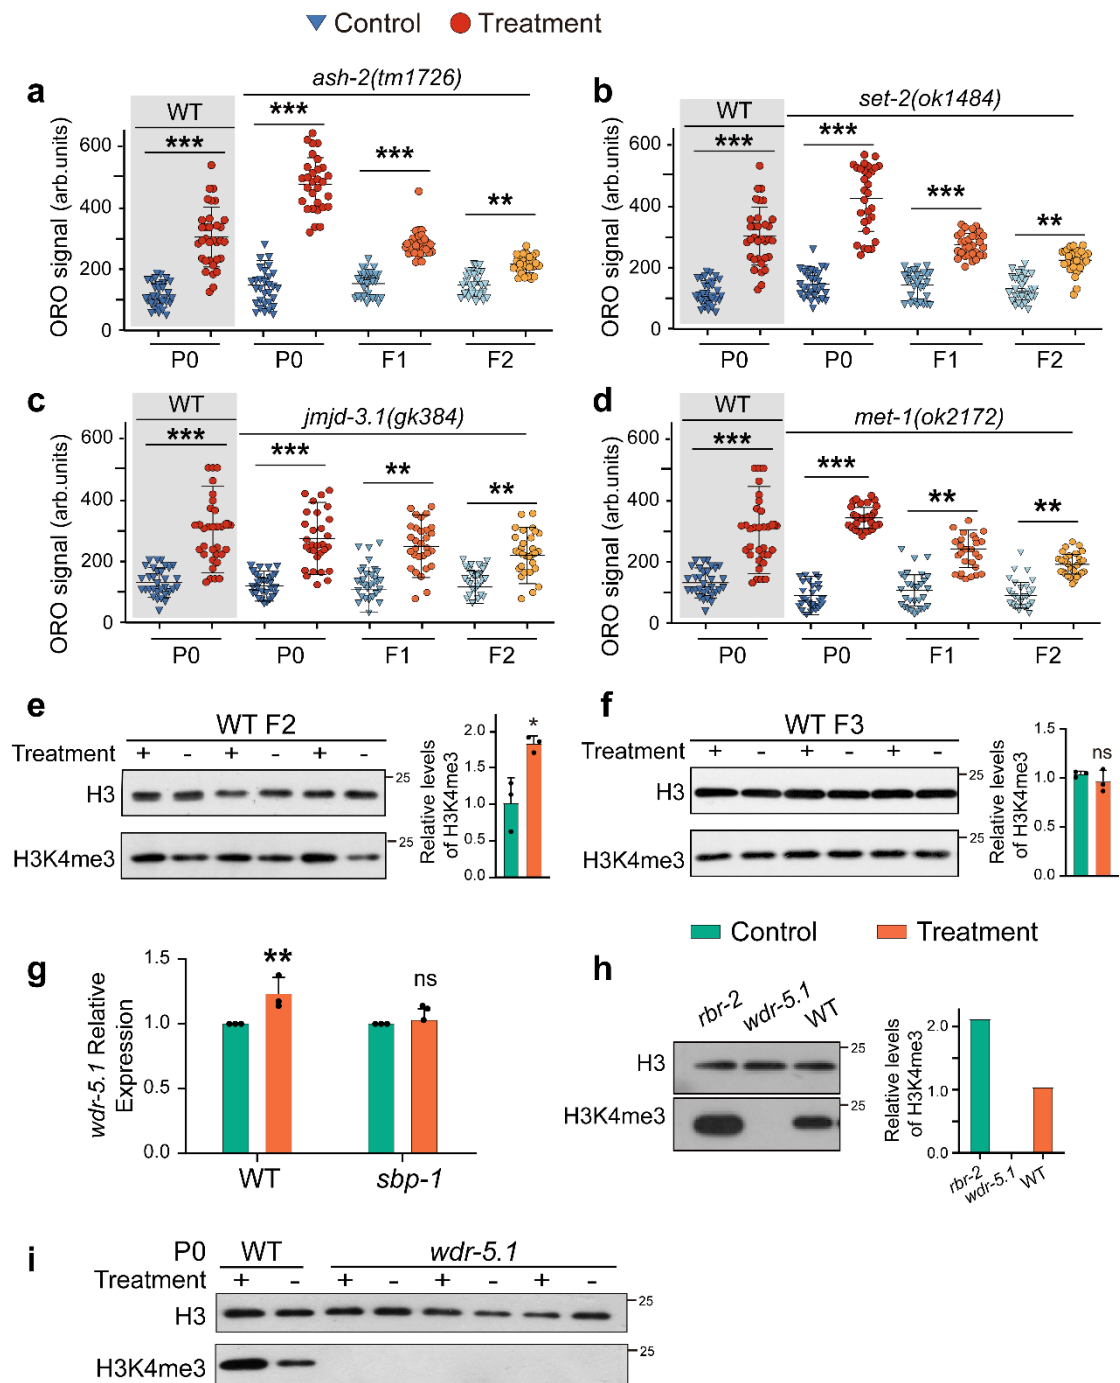

Supplementary Fig. 6 Other histone modifications including H3K27me3 and H3K36me3 are not required for transgenerational inheritance of lipid accumulation induced by the HFD. Transgenerational inheritance test of HFD-

induced lipid accumulation in *ash-2* mutant (n ≥ 30 per condition) **(a)**, *set-2* mutant (n ≥ 30 per condition) **(b)**, *jmjd-3.1* mutant (n ≥ 30 per condition) **(c)** and *met-1* mutant (n ≥ 29 per condition) **(d)**. For Fig. **a-d**, graph data are presented as mean ± SD, statistical analyses were performed by unpaired two-tailed Student's t-test; \*\*\*  $p < 0.001$ , and \*\*  $p < 0.01$ , and the ORO staining values of the replicated tests are listed in Source Data file. **(e, f)** Western blots (left panels) and quantification (right panels) of histone H3K4me3 modification of WT animals in F2 and F3 progeny from parents fed with HFD (means ± SD, unpaired two-tailed Student's t-test, n = 3 biologically independent samples, \*  $p < 0.05$ , ns, no significance). H3 was shown as loading control. **(g)** *wdr-5.1* mRNA level in WT or *sbp-1* mutant fed with or without HFD. Mean ± SD; Student's t-test; n = 3 biologically independent samples; \*\*  $p < 0.01$  and ns: no significance. **(h)** Western blots (left panels) and quantification (right panels) of histone H3K4me3 modification in *rbr-2* mutant, *wdr-5.1* mutant and WT N2 (n = 1). **(i)** The levels of histone H3K4me3 modification in *wdr-5.1* mutant fed with or without HFD (n = 3 biologically independent samples). Source data are provided as a Source Data file

Supplementary Fig. 7

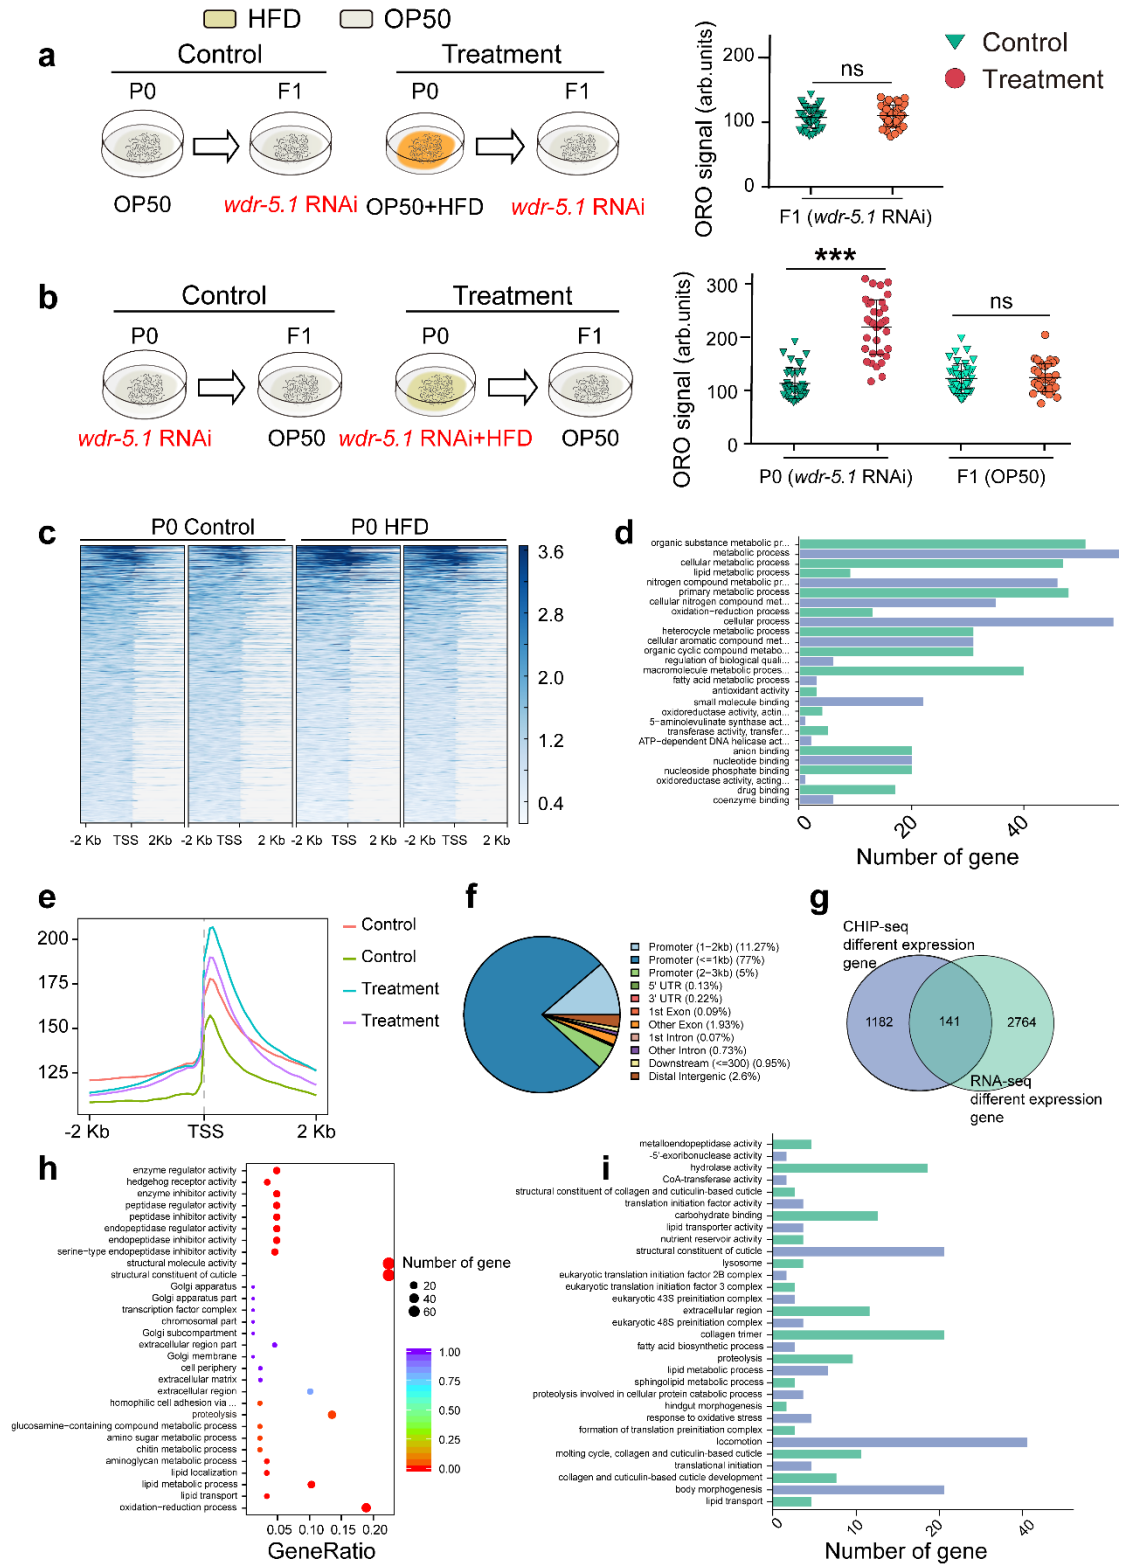

Supplementary Fig. 7 Analyses of differentially expressed genes from P0 worms with or without HFD in wild-type worms. (a) P0 worms were fed with or without

HFD, and F1 progeny were exposed to *wdr-5.1* RNAi to determine the requirement of *wdr-5.1* in the F1 generation ( $n \geq 28$  per condition). **(b)** P0 animals were fed with or without HFD and subjected to *wdr-5.1* RNAi, and then lipid level of F1 progeny was analyzed ( $n \geq 31$  per condition). Graph data are presented as mean  $\pm$  SD, statistical analyses were performed by unpaired two-tailed Student's t-test; \*\*\*  $p < 0.001$ , ns, no significance. Source data are provided as a Source Data file. **(c)** Heatmap of H3K4me3 ChIP signals approximately 2 kb upstream and downstream of regions that were differentially enriched in P0 generation between the treatment and control groups. The peaks were ranked in a descending order of H3K4me3 intensity within each cluster. The data shown refer to common genes as indicated by two independent assays. **(d)** Box plots of gene ontology term (GO) analysis of the differential H3K4me3 modification in the P0 animals fed with HFD or OP50. **(e)** Profile plot of H3K4me3 modification in the WT animals fed with HFD or OP50. **(f)** Pie chart of the genomic distribution of H3K4me3 differentially accumulated peaks for P0 animals fed with HFD or OP50. **(g)** Venn diagram comparing H3K4me3 differentially accumulated genes and the levels of mRNA dysregulated genes upon P0 animals fed with HFD. **(h)** Dot plots of gene ontology term (GO) analysis of the mRNAs differentially regulated in the P0 animals fed with HFD. **(i)** Box plots of gene ontology term (GO) analysis of the overlapping genes that were significantly changed in both CHIP-seq and RNA-seq data.

## Supplementary Fig. 8

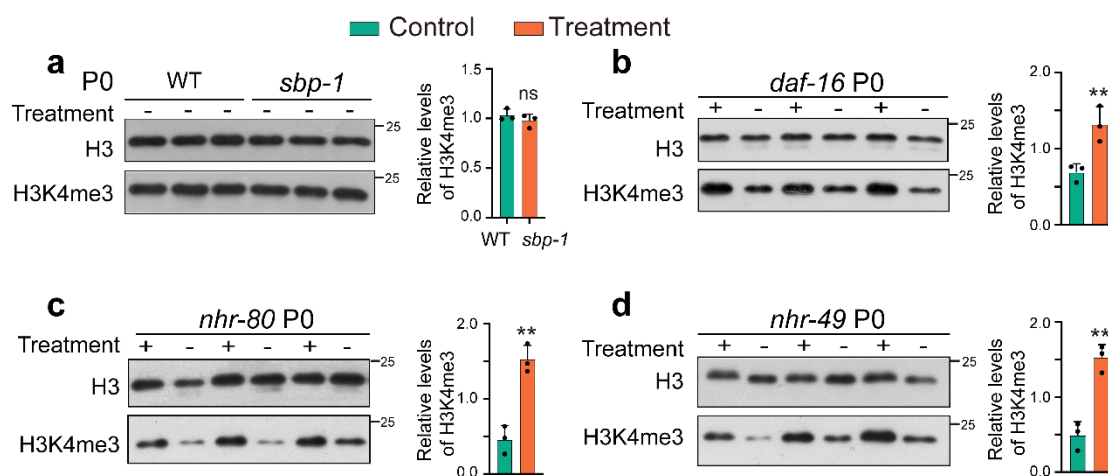

**Supplementary Fig. 8 DAF-16, NHR-80 and NHR-49 did not affect the elevation of H3K4me3 induced by HFD.** (a) Western blots (left panels) and quantification (right panels) of H3K4me3 modification level in WT or *sbp-1* mutant fed with normal food. (b-d) Western blots (left panels) and quantification (right panels) of H3K4me3 modification level in *daf-16* mutant (b), *nhr-80* mutant (c) and *nhr-49* mutant (d), when animals fed with or without the HFD. Means  $\pm$  SD, unpaired two-tailed Student's t-test,  $n = 3$  biologically independent samples, \*\*  $p < 0.01$ , ns, no significance. H3 was shown as loading control. Source data are provided as a Source Data file.

## Supplementary Fig. 9

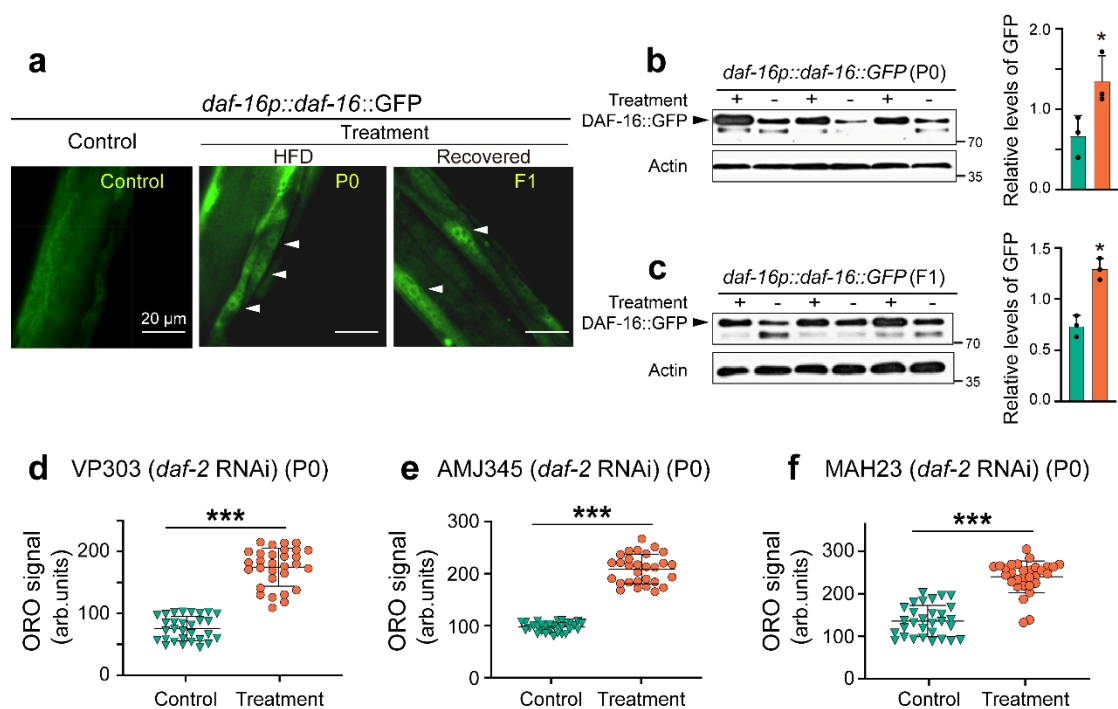

**Supplementary Fig. 9 DAF-16 mediated TEI induced by HFD in a DAF-2 independent manner.** Nuclear localization (representative of three experiments) (a) and western blots (left panels) and quantification (right panels) of DAF-16::GFP expression in the P0 transgenic worms fed with or without HFD (n = 3 biologically independent samples) (b) and their recovered F1 progeny (n = 3 biologically independent samples) (c) (means  $\pm$  SD, unpaired two-tailed Student's t-test, \*  $p < 0.05$ ). Actin was shown as loading control. (d-f) Quantification of ORO staining in animals subjected to intestine-specific *daf-2* RNAi (n  $\geq$  30 per condition) (d), germline and intestine-specific *daf-2* RNAi (n  $\geq$  30 per condition) (e), and germline specific *daf-2* RNAi (n  $\geq$  30 per condition) (f). Graph data are presented as mean  $\pm$  SD, statistical analyses were performed by unpaired two-tailed Student's t-test; \*\*\*  $p < 0.001$ , and Source data are provided as a Source Data file.

## Supplementary Fig. 10

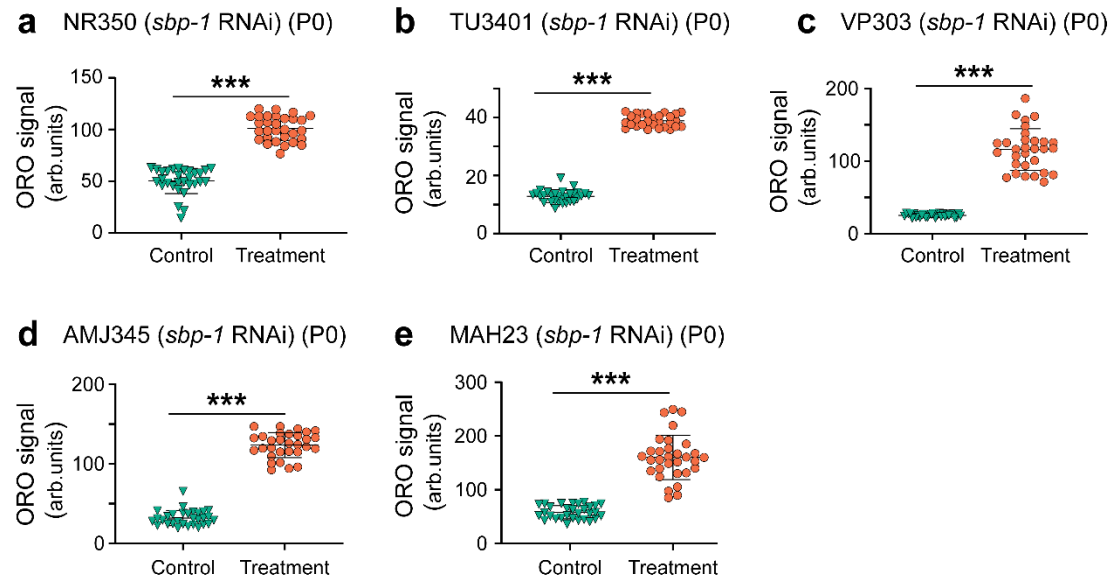

**Supplementary Fig. 10 Tissue-specific RNAi of *sbp-1*.** (a-e) Quantification of ORO staining in animals subjected to muscle-specific *sbp-1* RNAi ( $n \geq 30$  per condition) (a), neuron-specific *sbp-1* RNAi ( $n \geq 30$  per condition) (b), intestine-specific *sbp-1* RNAi ( $n \geq 30$  per condition) (c), germline and intestine-specific *sbp-1* RNAi ( $n \geq 30$  per condition) (d), germline specific *sbp-1* RNAi ( $n \geq 30$  per condition) (e). Graph data are presented as mean  $\pm$  SD, statistical analyses were performed by unpaired two-tailed Student's t-test; \*\*\*  $p < 0.001$ , and Source data are provided as a Source Data file.

**Supplementary Table 1. The primers used in RT-qPCR and Chip-qPCR**

| Primer sequences used for RT-qPCR and Chip-qPCR (5'→3'): |          |                              |
|----------------------------------------------------------|----------|------------------------------|
| Primer name                                              | Used for | Sequences(5'-3')             |
| <i>cdc-42</i> Forward                                    | RT-qPCR  | CTGCTGGACAGGAAGATTACG        |
| <i>cdc-42</i> Reversed                                   | RT-qPCR  | CTCGGACATTCTCGAATGAAG        |
| <i>dod-3</i> Forward                                     | RT-qPCR  | CGTATATGGACCCAGCTAATG        |
| <i>dod-3</i> Reverse                                     | RT-qPCR  | ATGAACACCGGCTCATTC           |
| <i>sod-3</i> Forward                                     | RT-qPCR  | AGCATCATGCCACCTACGTGA        |
| <i>sod-3</i> Reverse                                     | RT-qPCR  | CACCACCATTGAATTCAGCG         |
| <i>daf-16</i> Forward                                    | RT-qPCR  | TCGTCGTCTCGTGTTTCTCCA        |
| <i>daf-16</i> Reverse                                    | RT-qPCR  | TTCCATAGGCACCCGGTAGTG        |
| <i>sbp-1</i> Forward                                     | RT-qPCR  | CATGAATTCATTTCGAGGGAGACGTCCC |
| <i>sbp-1</i> Reverse                                     | RT-qPCR  | CATGAATTCCTGATGTGGAGTCATCGC  |
| <i>nhr-49</i> Forward                                    | RT-qPCR  | GTCGTTATTGTCGCTTTCAA         |
| <i>nhr-49</i> Reverse                                    | RT-qPCR  | TCCGACACCGTTGCTGTTTC         |
| <i>nhr-80</i> Forward                                    | RT-qPCR  | TGAGGTTTCAGGAGCCAAATAG       |
| <i>nhr-80</i> Reverse                                    | RT-qPCR  | GAAGGAGGTGGACGATGAGA         |
| <i>M199.2</i> Forward                                    | RT-qPCR  | ACCGCAGAGATTTGGGACAG         |
| <i>M199.2</i> Reverse                                    | RT-qPCR  | TTTGCGAAGTTGCGTAGCAC         |
| <i>gmd-2</i> Forward                                     | RT-qPCR  | GTGGTGA ACTATCGGGAGGC        |
| <i>gmd-2</i> Reverse                                     | RT-qPCR  | AAGATTGCAGAACTCGCGGA         |



|                       |           |                        |
|-----------------------|-----------|------------------------|
| <i>csn-2</i> Forward  | RT-qPCR   | TTACGAGTTGGCGACACAGG   |
| <i>csn-2</i> Reverse  | RT-qPCR   | CCAGGAAACGACCATCACGA   |
| <i>fat-5</i> Forward  | RT-qPCR   | GGGCTACAGTTGGATGGGTATT |
| <i>fat-5</i> Reverse  | RT-qPCR   | CGGGTCAGCATCAGTATCCG   |
| <i>fat-6</i> Forward  | RT-qPCR   | AAGATTGAGAAGGACGGCGG   |
| <i>fat-6</i> Reverse  | RT-qPCR   | TCACGGTTTGCCATTTTGCC   |
| <i>fat-7</i> Forward  | RT-qPCR   | AAGGAGCATGGAGGCAAACCT  |
| <i>fat-7</i> Reverse  | RT-qPCR   | TTCTCAACGGCGGAAACAGA   |
| <i>daf-16</i> Forward | ChIP-qPCR | TTGGAGAAAGAGAGCGAGCG   |
| <i>daf-16</i> Reverse | ChIP-qPCR | CGGGCACAGGAGAAGAAGAG   |
| <i>sbp-1</i> Forward  | ChIP-qPCR | GTCGGATGCAAGTCCTCACTTA |
| <i>sbp-1</i> Reverse  | ChIP-qPCR | GTGAGATGTCGTGGGCATATTG |
| <i>nhr-49</i> Forward | ChIP-qPCR | TGTCCTTCTAACCGACTGGC   |
| <i>nhr-49</i> Reverse | ChIP-qPCR | CAAAGCTAATTGGGACCGGC   |
| <i>nhr-80</i> Forward | ChIP-qPCR | ACACCACACTCTCTCGCCT    |
| <i>nhr-80</i> Reverse | ChIP-qPCR | TCCCGCCAAACTGTAGAACATA |
| <i>M199.2</i> Forward | ChIP-qPCR | TTATACACAAGAGACGACGGC  |
| <i>M199.2</i> Reverse | ChIP-qPCR | TGACGCAGTGAATTGTTCGC   |
| <i>gmd-2</i> Forward  | ChIP-qPCR | CACTCGAAGCGATATGGAAGGA |
| <i>gmd-2</i> Reverse  | ChIP-qPCR | TGAATAGTTCCCGGATACGCAG |
| <i>csn-2</i> Forward  | ChIP-qPCR | TGGACAGAATAATGGGTGACGA |
| <i>csn-2</i> Reverse  | ChIP-qPCR | ACCGAACTTTTCCTGGGTCTC  |

|                      |           |                         |
|----------------------|-----------|-------------------------|
| <i>fat-5</i> Forward | ChIP-qPCR | AGACCTGACCTGATCGAGCTTT  |
| <i>fat-5</i> Reverse | ChIP-qPCR | TAACTACTGCAAAAGAAGGGGCG |
| <i>fat-6</i> Forward | ChIP-qPCR | GCTTGCCCAGACATACCACA    |
| <i>fat-6</i> Reverse | ChIP-qPCR | GGTGATTGGTGTTTGCACCG    |
| <i>fat-7</i> Forward | ChIP-qPCR | CGCTCGCCCCATTGAAATAC    |
| <i>fat-7</i> Reverse | ChIP-qPCR | AATCCTCGCTTCTGGCTTGG    |
